# Supplementary material for: Deep learning using computed tomography to identify high-risk patients for acute small bowel obstruction: development and validation of a prediction model : a retrospective cohort study
Source: PubMed Central journal article supplement — Int J Surg. 2023 Sep 14;109(12):4091–100. doi: 10.1097/JS9.0000000000000721 (PMC10720875; doi:10.1097/js9.0000000000000721), 2023-09-14
Supplement: js9-109-4091-s003.pdf [file js9-109-4091-s003.pdf]

| <b>Appendix. I Exclusion cases for nonoperative patients</b>        | <b>No</b> |
|---------------------------------------------------------------------|-----------|
| <b>Normal findings or no small bowel obstruction</b>                | 129       |
| <b>Carcinomatosis</b>                                               | 29        |
| <b>Postoperative ileus</b>                                          | 25        |
| <b>Constipation</b>                                                 | 27        |
| <b>Colonic obstruction</b>                                          | 22        |
| <b>Enteritis</b>                                                    | 21        |
| <b>Urinary tract infection</b>                                      | 8         |
| <b>Urolithiasis</b>                                                 | 8         |
| <b>Inflammatory bowel disease or Tuberculosis related enteritis</b> | 6         |
| <b>Bowel ischemia or infarct</b>                                    | 6         |
| <b>Pelvic inflammatory disease</b>                                  | 5         |
| <b>Peritonitis</b>                                                  | 7         |
| <b>Gastric obstruction</b>                                          | 4         |
| <b>Appendicitis of perforated appendicitis</b>                      | 4         |
| <b>Cholecystitis, chronic cholecystitis</b>                         | 4         |
| <b>Superior mesentery artery (SMA) dissection, SMA thrombosis</b>   | 4         |
| <b>Pancreatic pseudocyst</b>                                        | 3         |
| <b>Pancreatitis.</b>                                                | 3         |

|                                                      |           |
|------------------------------------------------------|-----------|
| <b>Intussusception</b>                               | <b>2</b>  |
| <b>Cholangiohepatitis</b>                            | <b>1</b>  |
| <b>Duodenal obstruction</b>                          | <b>1</b>  |
| <b>Radiation related enteritis</b>                   | <b>1</b>  |
| <b>SMA syndrome</b>                                  | <b>1</b>  |
| <b>Aortic dissection</b>                             | <b>1</b>  |
| <b>Endometriosis</b>                                 | <b>1</b>  |
| <b>Internal hernia</b>                               | <b>1</b>  |
| <b>Ovarian torsion</b>                               | <b>1</b>  |
| <b>Pneumoperitoneum</b>                              | <b>1</b>  |
| <b>Portal vein thrombosis</b>                        | <b>1</b>  |
| <b>Radiation enteritis</b>                           | <b>1</b>  |
| <b>Recurred gastrointestinal stromal tumor(GIST)</b> | <b>1</b>  |
| <b>Uterine rupture</b>                               | <b>1</b>  |
| <b>Image quality or lack of report</b>               | <b>37</b> |
