# Supplementary material for: Deep learning using computed tomography to identify high-risk patients for acute small bowel obstruction: development and validation of a prediction model : a retrospective cohort study
Source: PubMed Central journal article supplement — Int J Surg. 2023 Sep 14;109(12):4091–100. doi: 10.1097/JS9.0000000000000721 (PMC10720875; doi:10.1097/js9.0000000000000721), 2023-09-14
Supplement: js9-109-4091-s004.pdf [file js9-109-4091-s004.pdf]

| <b>Appendix. II Exclusion cases for operative patients</b> | <b>No</b> |
|------------------------------------------------------------|-----------|
| No ASBO or ileus                                           | 87        |
| Postoperative ileus                                        | 49        |
| Subtotal or total gastrectomy                              | 38        |
| Artifact or poor image quality or Gastrograffin            | 38        |
| Cancer-related obstruction                                 | 35        |
| Appendicitis or perforated appendicitis                    | 31        |
| Peritonitis                                                | 27        |
| Bowel ischemia or infarct                                  | 21        |
| Trauma-related operation                                   | 20        |
| Colonic obstruction                                        | 16        |
| Parastomal or incisional hernia                            | 14        |
| Age<= 18yr old                                             | 6         |
| Retroperitoneal abscess, cancer, bleeding                  | 5         |
| Gastric or Duodenal obstruction                            | 5         |
| Intussusception                                            | 5         |
| Complicated infected fluid collection                      | 4         |
| Inflammatory bowel disease                                 | 4         |
| Ileostomy-related obstruction.                             | 4         |
| Cholecystitis                                              | 2         |
| Enteritis                                                  | 2         |
| Superior mesentery artery syndrome                         | 2         |

|                                                   |          |
|---------------------------------------------------|----------|
| <b>Enterocutaneous fistula</b>                    | <b>2</b> |
| <b>Chronic pancreatitis</b>                       | <b>1</b> |
| <b>Small bowel stricture</b>                      | <b>1</b> |
| <b>Bezoa</b>                                      | <b>1</b> |
| <b>Pelvic inflammatory disease, endometriosis</b> | <b>1</b> |
| <b>Vaginal prolapse</b>                           | <b>1</b> |
| <b>Encapsulated bowel</b>                         | <b>1</b> |
| <b>Uterine rupture</b>                            | <b>1</b> |
| <b>Others</b>                                     | <b>6</b> |
