# Supplementary material for: Deep learning using computed tomography to identify high-risk patients for acute small bowel obstruction: development and validation of a prediction model : a retrospective cohort study
Source: PubMed Central journal article supplement — Int J Surg. 2023 Sep 14;109(12):4091–100. doi: 10.1097/JS9.0000000000000721 (PMC10720875; doi:10.1097/js9.0000000000000721), 2023-09-14
Supplement: js9-109-4091-s005.pdf [file js9-109-4091-s005.pdf]

### Appendix.3 Patient demographics

|                                       | <b>Operative<br/>(n = 167)</b> | <b>Nonoperative<br/>(n = 161)</b> | <b>P value</b> | <b>SMD</b> |
|---------------------------------------|--------------------------------|-----------------------------------|----------------|------------|
| <b>Age (mean (SD))</b>                | 56.01 (16.97)                  | 58.93 (18.39)                     | 0.136          | 0.165      |
| <b>Sex = Female (%)</b>               | 93 (55.7)                      | 79 (49.1)                         | 0.276          | 0.133      |
| <b>High vs low = low_grade (%)</b>    | 0 (0.0)                        | 119 (73.9)                        | <0.001         | 2.38       |
| <b>Operation = Nonoperative (%)</b>   | 0 (0.0)                        | 161 (100.0)                       | <0.001         | NaN        |
| <b>BMI (mean (SD))</b>                | 21.80 (2.95)                   | 22.25 (4.10)                      | 0.283          | 0.127      |
| <b>Previous operation history (%)</b> |                                |                                   | <0.001         | 0.943      |
| <b>Gynecologic operation</b>          | 31 (18.6)                      | 28 (17.4)                         |                |            |
| <b>Hepato-biliary operation</b>       | 4 (2.4)                        | 7 (4.3)                           |                |            |
| <b>Lower GI operation</b>             | 57 (34.1)                      | 35 (21.7)                         |                |            |
| <b>No operation</b>                   | 18 (10.8)                      | 73 (45.3)                         |                |            |
| <b>Small bowel surgery or hernia</b>  | 25 (15.0)                      | 9 (5.6)                           |                |            |
| <b>Upper GI operation</b>             | 32 (19.2)                      | 9 (5.6)                           |                |            |
